# Supplementary material for: Glutaraldehyde-Polymerized Hemoglobin: In Search of Improved Performance as Oxygen Carrier in Hemorrhage Models
Source: Bioinorg Chem Appl. 2020 Sep 1;2020:1096573. doi: 10.1155/2020/1096573 (PMC7482000; doi:10.1155/2020/1096573)
Supplement: Supplementary Materials — Table S1: blood arterial tension (mmHg) across the first 0–90 minutes after treatment with HBOC, following hemorrhage. Table S2: blood arterial tension (mmHg), and survival rates at 24 hours. Table S3: hematocrit and hemoglobin values of control and experimental groups. Values are expressed as mean ± SEM. Table S4: acid-base equilibrium of control and experimental animals. Values are expressed as mean ± SEM. Table S5: renal function parameters of control and experimental animals. Values are expressed as mean ± SEM. Table S6. Oxidative and nitrosative stress status of control and experimental animals, reflected by glutathione peroxidase and 3-nitrotyrosine. Values are expressed as mean ± SEM. Table S7: blood ion concentration of control and experimental animals. Values are expressed as mean ± SEM. Table S8. Iron deposits evaluation by Perls staining in liver. The evaluation of the histochemical reaction was done by Grover et al. (2015) method as follows: +/−, slight to absent reaction; +, slight reaction; ++, moderate reaction; +++, intense reaction. [file 1096573.f1.docx]

Supporting Information

**Glutaraldehyde-polymerized hemoglobin: in search of improved performance as oxygen carrier in hemorrhage models**

**Anca D. Farcas1,2,3**,a **Vlad Al. Toma1,2,3,** a **Ioana Roman1**, **Bogdan Sevastre4**, **Florina Scurtu2**, **Radu Silaghi-Dumitrescu2***

*corresponding author, rsilaghi@chem.ubbcluj.ro

aauthors with equal contributions

1Institute of Biological Research Cluj-Napoca 400113, branch of NIRDBS Bucharest, Romania

2Department of Chemistry and Chemical Engineering, Babeș-Bolyai University, Cluj-Napoca 400028, Romania

3National Institute for Research and Development of Isotopic and Molecular Technologies, 400293 Cluj-Napoca, Romania

4Department of Pathophysiology, University of Agricultural Sciences and Veterinary Medicine, Cluj-Napoca, 400372, Romania

**Table S1.** Blood arterial tension (mmHg) across the first 0-90 minutes after treatment with HBOC, following hemorrhage.

| **Group** | **0** | **5** | **10** | **15** | **30** | **60** | **90** | ***d(0-90)a*** |
| --- | --- | --- | --- | --- | --- | --- | --- | --- |
| **C** | NA | NA | 81 | NA | 79 | 82 | 79 | *36* |
| **Pls** | 96 | 93 | 107 | 117 | 102 | 80 | 77 | *19* |
| **Gf** | 148 | 58 | 71 | 80 | 85 | 76 | 54 | *94* |
| **Hb(b)/PBS** | 84 | 74 | 73 | 83 | 84 | 109 | 100 | *-16* |
| **Hb(b)/Pls** | 113 | 105 | 109 | 97 | 69 | 73 | 77 | *36* |
| **Hb(b)/Gf** | 150 | 107 | 116 | 115 | 96 | 97 | 61 | *89* |
| **Hb(ov)/PBS** | 95 | 82 | 72 | 72 | 79 | 79 | 88 | *8* |
| **Hb(ov)/Pls** | 95 | 83 | 119 | 93 | 92 | 72 | 80 | *15* |
| **HbBSA** | 97 | 106 | 82 | 104 | 112 | 120 | 107 | *-10* |
| **HbRSA** | 127 | 118 | 112 | 112 | 119 | 103 | 95 | *32* |
| **HbRbr/PBS** | 119 | 100 | 87 | 78 | 81 | 72 | 64 | *56* |

adifference between time immediately after treatment (0) and 90 minutes.

**Table S2.** Blood arterial tension (mmHg) and survival rates at 24 hours.

| **Group** | **Initial** | **shock** | **treatment** | **final** | **d(shock)a** | **d(treatment)b** | **d(final)c** | **survival (%)d** |
| --- | --- | --- | --- | --- | --- | --- | --- | --- |
| **C** | 107 | 115 | 81 | 115 | *8* | -34 | *8* | 100 |
| **H** | 101 | 65 | NA | 89 | *-36* | NA | *-12* | 75 |
| **Pls** | 106 | 75 | 96 | 118 | *-31* | 21 | *12* | 100 |
| **Gf** | 128 | 62 | 148 | 110 | *-66* | 86 | *-18* | 75 |
| **Hb(b)/PBS** | 135 | 113 | 84 | 99 | *-22* | -29 | *15* | 100 |
| **Hb(b)/Pls** | 94 | 62 | 113 | 101 | *-32* | 51 | *7* | 75 |
| **Hb(b)/Gf** | 98 | 64 | 150 | 109 | *-34* | 86 | *11* | 75 |
| **Hb(ov)/PBS** | 104 | 64 | 95 | 105 | *-40* | 31 | *1* | 100 |
| **Hb(ov)/Pls** | 131 | 66 | 95 | 121 | *-65* | 29 | *-10* | 100 |
| **HbBSA** | 95 | 60 | 97 | 87 | *-35* | 37 | *-8* | 25 |
| **HbRSA** | 110 | 71 | 127 | 90 | *-39* | 56 | *-20* | 75 |
| **HbRbr/PBS** | 116 | 67 | 119 | 92 | *-49* | 52 | *-24* | 50 |

adifference between time points immediately after hemorrhage and prior to hemorrhage

bimmediate change in AT induced by administration of treatment

cdifference between final time point (24 hours) and time point immediately after treatment

dsurvivors after administration of treatment (at 24 hours)

**Table S3.** Hematocrit and hemoglobin values of Control and experimental groups. Values are expressed as mean ± SEM.

| **Param.** | **C** | **H 30’** | **H 24h** | **Pls** | **Gf** | **Hb(b)/PBS** | **Hb(b)/Pls** | **Hb(b)/Gf** | **Hb(ov)/PBS** | **Hb(ov)/Pls** | **HbBSA** |
| --- | --- | --- | --- | --- | --- | --- | --- | --- | --- | --- | --- |
| Hct  (%) | 36.75±1.48 | 34.88±0.35 | 34.50±2.10 | 35.88±4.63 | 35.38±2.22 | 41.63±3.98 | 49.50±1.66#,¥ | 26.75±1.85 | 22.50±1.04* | 34.75±5.38 | 36.00±1.62 |
| Hgb  (g/dL) | 12.54±0.50 | 11.88±0.09 | 11.70±0.73 | 12.23±1.60 | 12.03±0.74 | 14.15±1.34 | 16.76±0.56#,¥ | 9.15±0.64 | 7.40±0.37* | 11.88±1.83 | 12.38±0.55 |

* Significant at *p* < 0.05; ** Significant at *p* < 0.01; *** Significant at *p* < 0.001

# Significant at *p* < 0.05; ## Significant at *p* < 0.01; ### Significant at *p* < 0.001 (compared with (H30’))

¥ Significant at *p* < 0.05; ¥¥ Significant at *p* < 0.01; ¥¥¥ Significant at *p* < 0.001 (compared with (H24h))

**Table S4.** Acid base equilibrium of control and experimental animals. Values are expressed as mean ± SEM.

| **Param.** | **C** | **H 30’** | **H 24h** | **Pls** | **Gf** | **Hb(b)/PBS** | **Hb(b)/Pls** | **Hb(b)/Gf** | **Hb(ov)/PBS** | **Hb(ov)/Pls** | **HbBSA** |
| --- | --- | --- | --- | --- | --- | --- | --- | --- | --- | --- | --- |
| pH | 7.33±0.01 | 7.40±0.01 | 7.37±0.01 | 7.38±0.03 | 7.380.04 | 7.32±0.00 | 7.31±0.01# | 7.41±0.00 | 7.38±0.01 | 7.34±0.01 | 7.31±0.01## |
| pCO2  (mmHg) | 54.83±1.94 | 46.08±2.90 | 54.56±2.18 | 53.50±5.74 | 49.99±1.54 | 60.03±3.25 | 59.05±2.67 | 51.15±1.09 | 50.61±0.93 | 60.89±2.71# | 53.88±3.48 |
| pO2  (mmHg) | 36.70±3.72 | 33.09±2.30 | 35.50±1.79 | 35.69±1.73 | 49.49±3.83# | 35.58±5.32 | 37.53±2.31 | 49.66±2.41# | 34.78±1.87 | 38.86±4.41 | 36.63±2.38 |
| cHCO3  (mmol/L) | 29.23±0.44 | 28.78±0.97 | 31.84±0.86 | 30.71±0.75 | 28.23±0.43 | 31.61±1.13 | 30.21±0.62 | 33.23±0.41*# | 30.46±0.13 | 33.10±0.86# | 27.03±1.04¥¥ |
| BE(ecf)(mmol/L) | 3.38±0.44 | 4.13±0.80 | 6.62±0.84 | 5.70±0.43 | 2.78±0.66 | 5.70±1.05 | 4.10±0.51 | 8.67±0.42***,## | 5.46±0.19 | 7.42±0.77** | 0.80±0.87¥¥¥ |
| BE(b)  (mmol/L) | 2.32±0.40 | 3.50±0.63 | 5.30±0.70** | 4.33±0.51 | 2.08±0.65 | 3.83±0.68 | 2.25±0.40¥¥ | 7.65±0.37***,### | 4.78±0.17 | 5.61±0.36** | -0.05±0.62###,¥¥¥ |

* Significant at *p* < 0.05; ** Significant at *p* < 0.01; *** Significant at *p* < 0.001 (compared with Control)

# Significant at *p* < 0.05; ## Significant at *p* < 0.01; ### Significant at *p* < 0.001 (compared with (H30’))

¥ Significant at *p* < 0.05; ¥¥ Significant at *p* < 0.01; ¥¥¥ Significant at *p* < 0.001 (compared with (H24h))

**Table S5.** Renal function parameters of control and experimental animals. Values are expressed as mean ± SEM.

| **Param.** | **C** | **H** | **Pls** | **Gf** | **Hb(b)/PBS** | **Hb(b)/Pls** | **Hb(b)/Gf** | **Hb/ov/Pls** | **Hb/ov/PBS** | **HbBSA** | **HbRSA** | **HbRbr** |
| --- | --- | --- | --- | --- | --- | --- | --- | --- | --- | --- | --- | --- |
| Crea  (mg/dL) | 1.20±0.04 | 1.20±0.06 | 0.85±0.18 | 1.30±0.07 | 1.40±0.04 | 1.36±0.08 | 1.25±0.10 | 1.21±0.03 | 1.08±0.03 | 1.50±0.05 | 1.05±0.01 | 1.85±0.08  ***,### |
| Urea(mg/dL) | 34.25±3.27 | 26.50±0.75 | 27.88±2.66 | 31.13±2.00 | 34.13±1.02 | 33.50±2.02 | 30.88±1.56 | 27.75±0.52 | 8.75±1.26  ***,### | 44.50±5.33# | 28.38±1.10 | 106.1±9.03  ***,### |

* Significant at *p* < 0.05; ** Significant at *p* < 0.01; *** Significant at *p* < 0.001

# Significant at *p* < 0.05; ## Significant at *p* < 0.01; ### Significant at *p* < 0.001 (compared with H)

**Table S6.** Oxidative and nitrosative stress status of control and experimental animals, reflected by glutathione peroxidase and 3-nitrotyrosine. Values are expressed as mean ± SEM.

| **Param.** | **C** | **H** | **Pls** | **Gf** | **Hb(b)/PBS** | **Hb(b)/Pls** | **Hb(b)/Gf** | **Hb(ov)/Pls** | **Hb(ov)/PBS** | **HbBSA** | **HbRSA** | **HbRbr** |
| --- | --- | --- | --- | --- | --- | --- | --- | --- | --- | --- | --- | --- |
| GPX  (UI) | 21.93±0.0 | 21.94±0.0 | 21.93±0.0 | 17.80±0.0***,### | 21.92±0.0 | 21.91±0.0## | 17.80±0.0***,### | 21.91±0.0## | 21.90±0.0 | 21.90±0.0*,### | 17.80±0.0  ***, ### | 21.91±0.0  ## |
| 3-NTyr  (pg/mL) | 0.203±0.0 | 0.173±0.0 | 0.153±0.0 | 0.158±0.01 | 0.160±0.01 | 0.140±0.0 | 0.155±0.01 | 0.165±0.01 | 0.170±0.01 | 0.137±0.01 | 0.150±0.01 | 0.140±0.01 |

* Significant at *p* < 0.05; ** Significant at *p* < 0.01; *** Significant at *p* < 0.001

# Significant at *p* < 0.05; ## Significant at *p* < 0.01; ### Significant at *p* < 0.001 (compared with H)

**Table S7.**Blood ion concentration of control and experimental animals. Values are expressed as mean ± SEM.

| **Param.** | **C** | **H** | **Pls** | **Gf** | **Hb(b)/PBS** | **Hb(b)/Pls** | **Hb(b)/Gf** | **Hb(o)/PBS** | **Hb(ov)/Pls** | **HbBSA** | **HbRSA** | **HbRbr** |
| --- | --- | --- | --- | --- | --- | --- | --- | --- | --- | --- | --- | --- |
| Iron  (µg/dL) | 165.6±19.99 | 107.8±12.64 | 159.4±17.68 | 112.5±21.27 | 72.50±7.74** | 71.13±7.09** | 111.3±14.51 | 72.75±2.34  *** | 75.88±10.83** | 57.25±10.16*** | 76.13±6.84  ** | 161.8±24.12 |
| Sodium  (mmol/L) | 146.0±1.30 | 146.6±0.92 | 143.9±0.69 | 145.6±0.77 | 143.1±1.87 | 147.4±0.86 | 143.9±1.69 | 142.6±0.18 | 143.9±1.04 | 147.8±0.31 | N.D. | N.D. |
| Potassium  (mmol/L) | 5.06±0.08 | 6.45±0.54 | 5.98±0.69 | 5.26±0.12 | 5.25±0.24 | 4.93±0.24 | 5.55±0.35 | 4.86±0.02 | 5.20±0.23 | 4.60±0.11# | N.D. | N.D. |
| Calcium  (mg/dL) | 1.42±0.01 | 1.40±0.01 | 1.37±0.02 | 1.45±0.01 | 1.33±0.05 | 1.41±0.01 | 1.41±0.03 | 1.39±0.01 | 1.27±0.06 | 1.40±0.01 | N.D. | N.D. |

* Significant at *p* < 0.05; ** Significant at *p* < 0.01; *** Significant at *p* < 0.001

# Significant at *p* < 0.05; ## Significant at *p* < 0.01; ### Significant at *p* < 0.001 (compared with H)

**Table S8. Iron deposits evaluation by Pearls staining in liver.** The evaluation of the histochemical reaction was done by Grover et al. (2015) method as follows: **+/-**, slight to absent reaction, **+,** slight reaction, **++**, moderate reaction, **+++**, intense reaction.

| **Group** | **Reaction** | **Group** | **Reaction** |
| --- | --- | --- | --- |
| **C** | **++** | **pHb(ov)/PBS** | **-/+** |
| **H** | **+** | **pHb(ov)/Pls** | **+** |
| **H+Pls** | **-/+** | **HbBSA+PBS** | **+** |
| **Gf** | **-** | **HbRSA** | **+/++** |
| **pHb(b)/Pls** | **-/+** | **HbRbr + PBS** | **++** |
| **pHb(b)/PBS** | **++/+++** | **HbRbr+Pls** | **++++** |
| **pHb(b)/Gf** | **+** |  |  |
